# Supplementary material for: A Systematic Review of the Attributes and Outcomes of Peer Work and Guidelines for Reporting Studies of Peer Interventions
Source: Atypon-hosted journal article supplement (doi:10.1176/appi.ps.201700564), 2018-07-02
Supplement: appi.ps.201700564.ds001.pdf [file appi.ps.201700564.ds001.pdf]

*Search terms for database searching*

- 1 exp Mental Disorders/
  - 2 exp Mental Health Services/
  - 3 exp Psychotic Disorders/
  - 4 exp Mental Disorders/
  - 5 exp Psychiatry/
  - 6 exp Mental Health/
  - 7 exp Mentally Ill Persons/
  - 8 exp Hospitals, Psychiatric/
  - 9 mental illness.mp.
  - 10 2 or 3 or 4 or 5 or 6 or 7 or 8 or 9
  - 11 peer support.mp.
  - 12 (peer adj2 (advocate\* or specialist\* or educator\* or counsellor\* or mentor\* or helper\* or led or leader\*)).mp.
  - 13 ((patient\* or consumer\*) adj2 advoca\*).mp.
  - 14 peer-to-peer.mp.
  - 15 exp Self-Help Groups/
  - 16 (mutual adj2 support\*).mp.
  - 17 11 or 12 or 13 or 14 or 15 or 16
  - 18 ((consumer\* or client\* or patient\*) adj2 (run or operat\* or service)).mp.
  - 19 (consumer-provider\* or peer provider\* or peer worker\*).mp.
  - 20 (consumer\* adj4 (led or leader\*)).mp.
  - 21 case manager aide.mp.
  - 22 18 or 19 or 20 or 21
  - 23 10 and 17 and 22
  - 24 limit 23 to randomized controlled trial
  - 25 limit 24 to (clinical trial, all or randomized controlled trial)
  - 26 10 and 17
  - 27 limit 26 to (english language and yr="1995 -Current" and randomized controlled trial)
  - 28 limit 26 to (english language and yr="1995 -Current" and clinical trial, all)
- NB. 28 not included in Embase and PsychINFO searches due to large number of results returned.

*PRISMA flow diagram of search strategy*

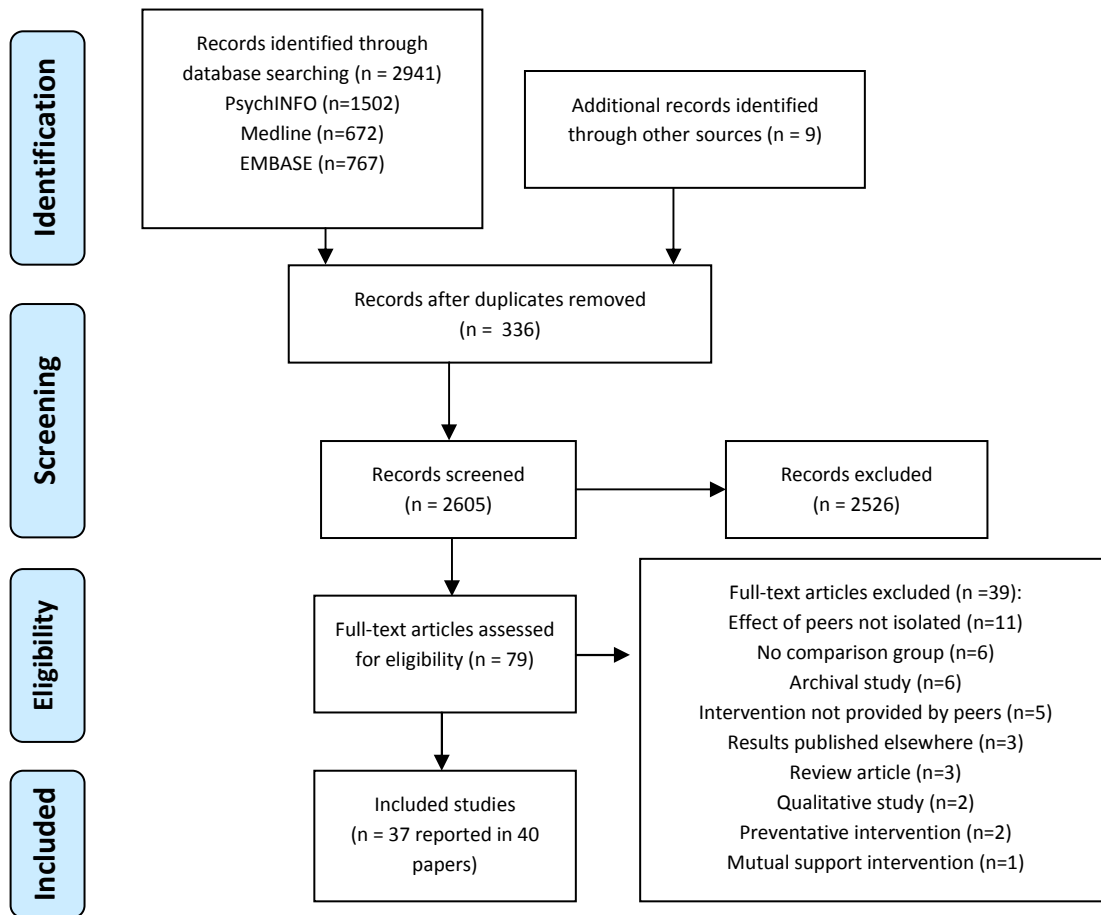

*Criteria for rating specification of program attributes*

| Program attribute | Setting                                                                                                                              | Definition of peer                                                                               | Peer control                                                                                                                      | Service user characteristics                                                                                                                                   | Services provided                                                                                                   | Training & supervision                                                                                            |
|-------------------|--------------------------------------------------------------------------------------------------------------------------------------|--------------------------------------------------------------------------------------------------|-----------------------------------------------------------------------------------------------------------------------------------|----------------------------------------------------------------------------------------------------------------------------------------------------------------|---------------------------------------------------------------------------------------------------------------------|-------------------------------------------------------------------------------------------------------------------|
| Criteria          | 1) Community or inpatient setting.<br>2) Services provided<br>3) Funding source<br>4) Area characteristics<br>5) Staffing<br>6) Size | 7) Lived experience of mental health concerns<br>8) Peer training or expertise<br>9) Paid/unpaid | 10) Involvement in operations of service<br>11) Involvement in intervention development<br>12) Supervision by clinicians or peers | 13) Age<br>14) Gender<br>15) Diagnosis<br>16) Illness severity<br>17) Exclusion criteria<br>18) Subset of entire population or representative of service users | 19) Activities<br>20) Peer work model/ principles used<br>21) Scope/dose of intervention<br>22) Group or individual | 23) Details of peer specific training<br>24) Details non peer training<br>25) Details of supervision arrangements |

|                                                                  |                      |     |     | in general           |     |     |
|------------------------------------------------------------------|----------------------|-----|-----|----------------------|-----|-----|
| No. of criteria needed to meet fully specified (FS) standard     | 6                    | 3   | 3   | 6                    | 4   | 3   |
| No. of criteria needed to meet partially specified (PS) standard | PS1: 4-5<br>PS2: 2-3 | 1-2 | 1-2 | PS1: 4-5<br>PS2: 2-3 | 2-3 | 1-2 |
| No. of criteria needed to meet unspecified (US) standard         | 0-1                  | 0   | 0   | 0-1                  | 0-1 | 0   |
